# Supplementary material
Source: Springer Nature journal article supplement (https://www.springermedizin.de/resource/supplementary/12936_2012_2561_MOESM1_ESM.pdf/9543182)

### No Misannotations (111 groups)

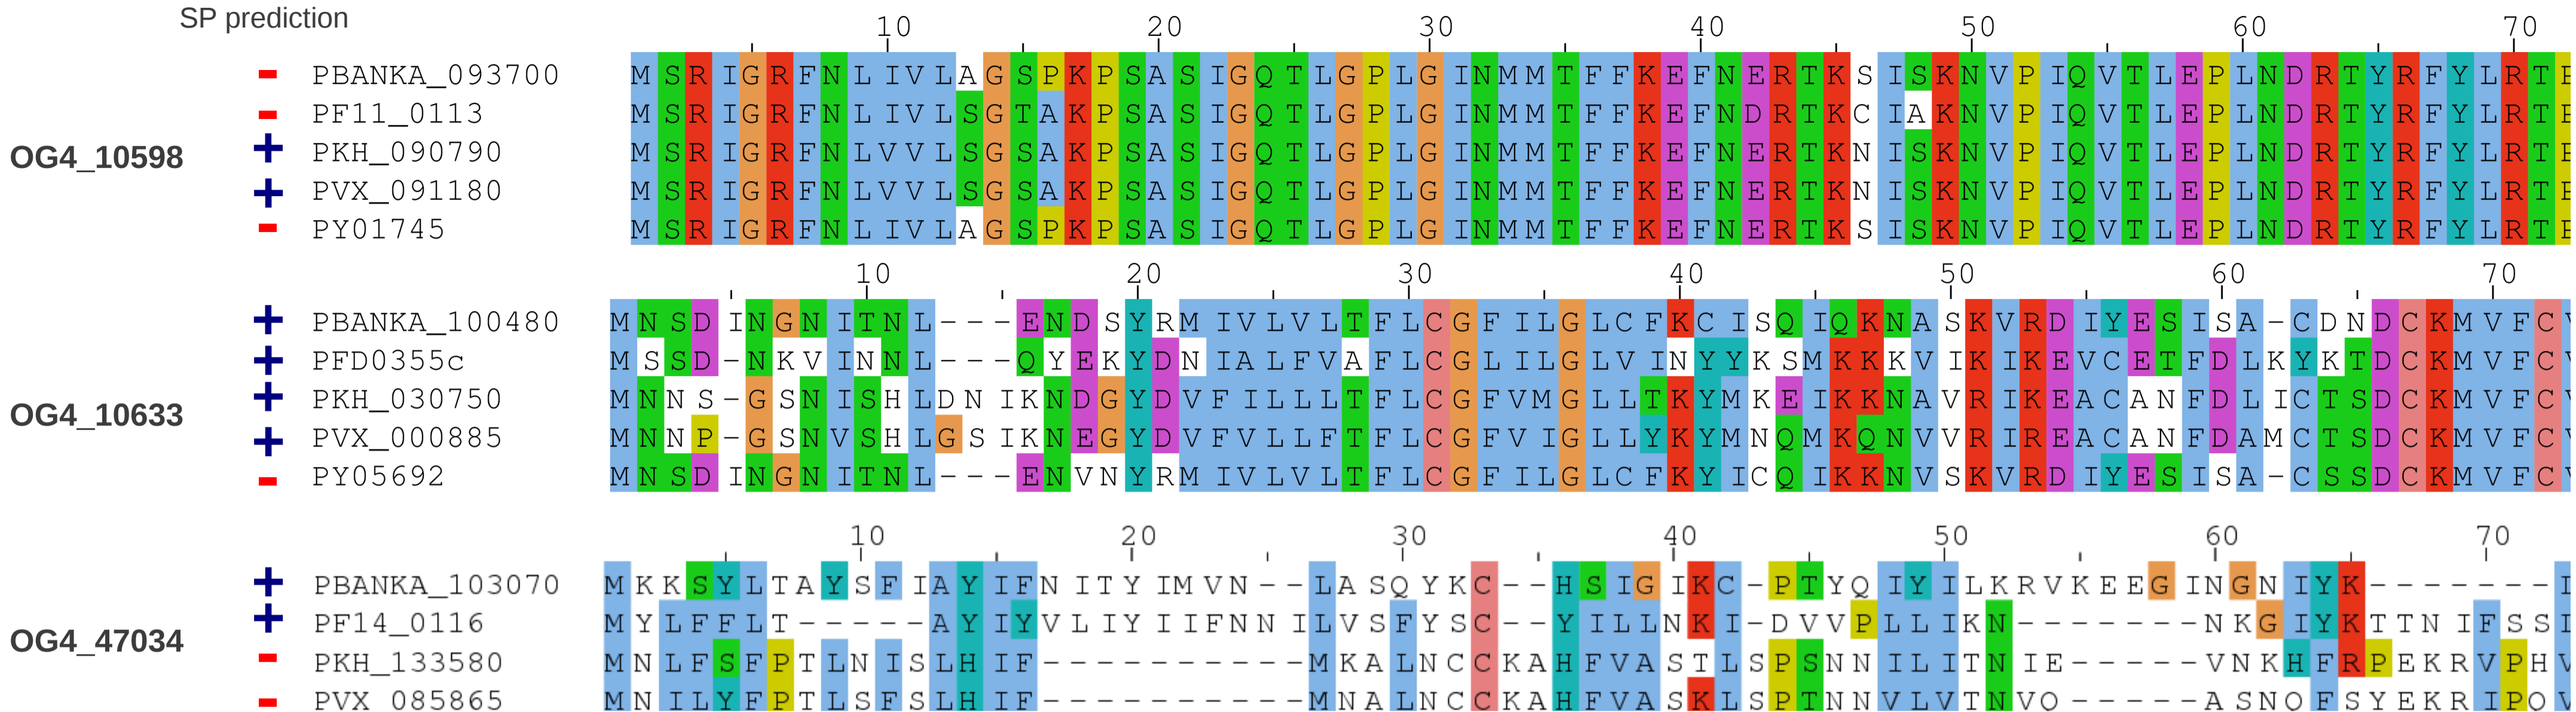

### Reannotated (331 groups)

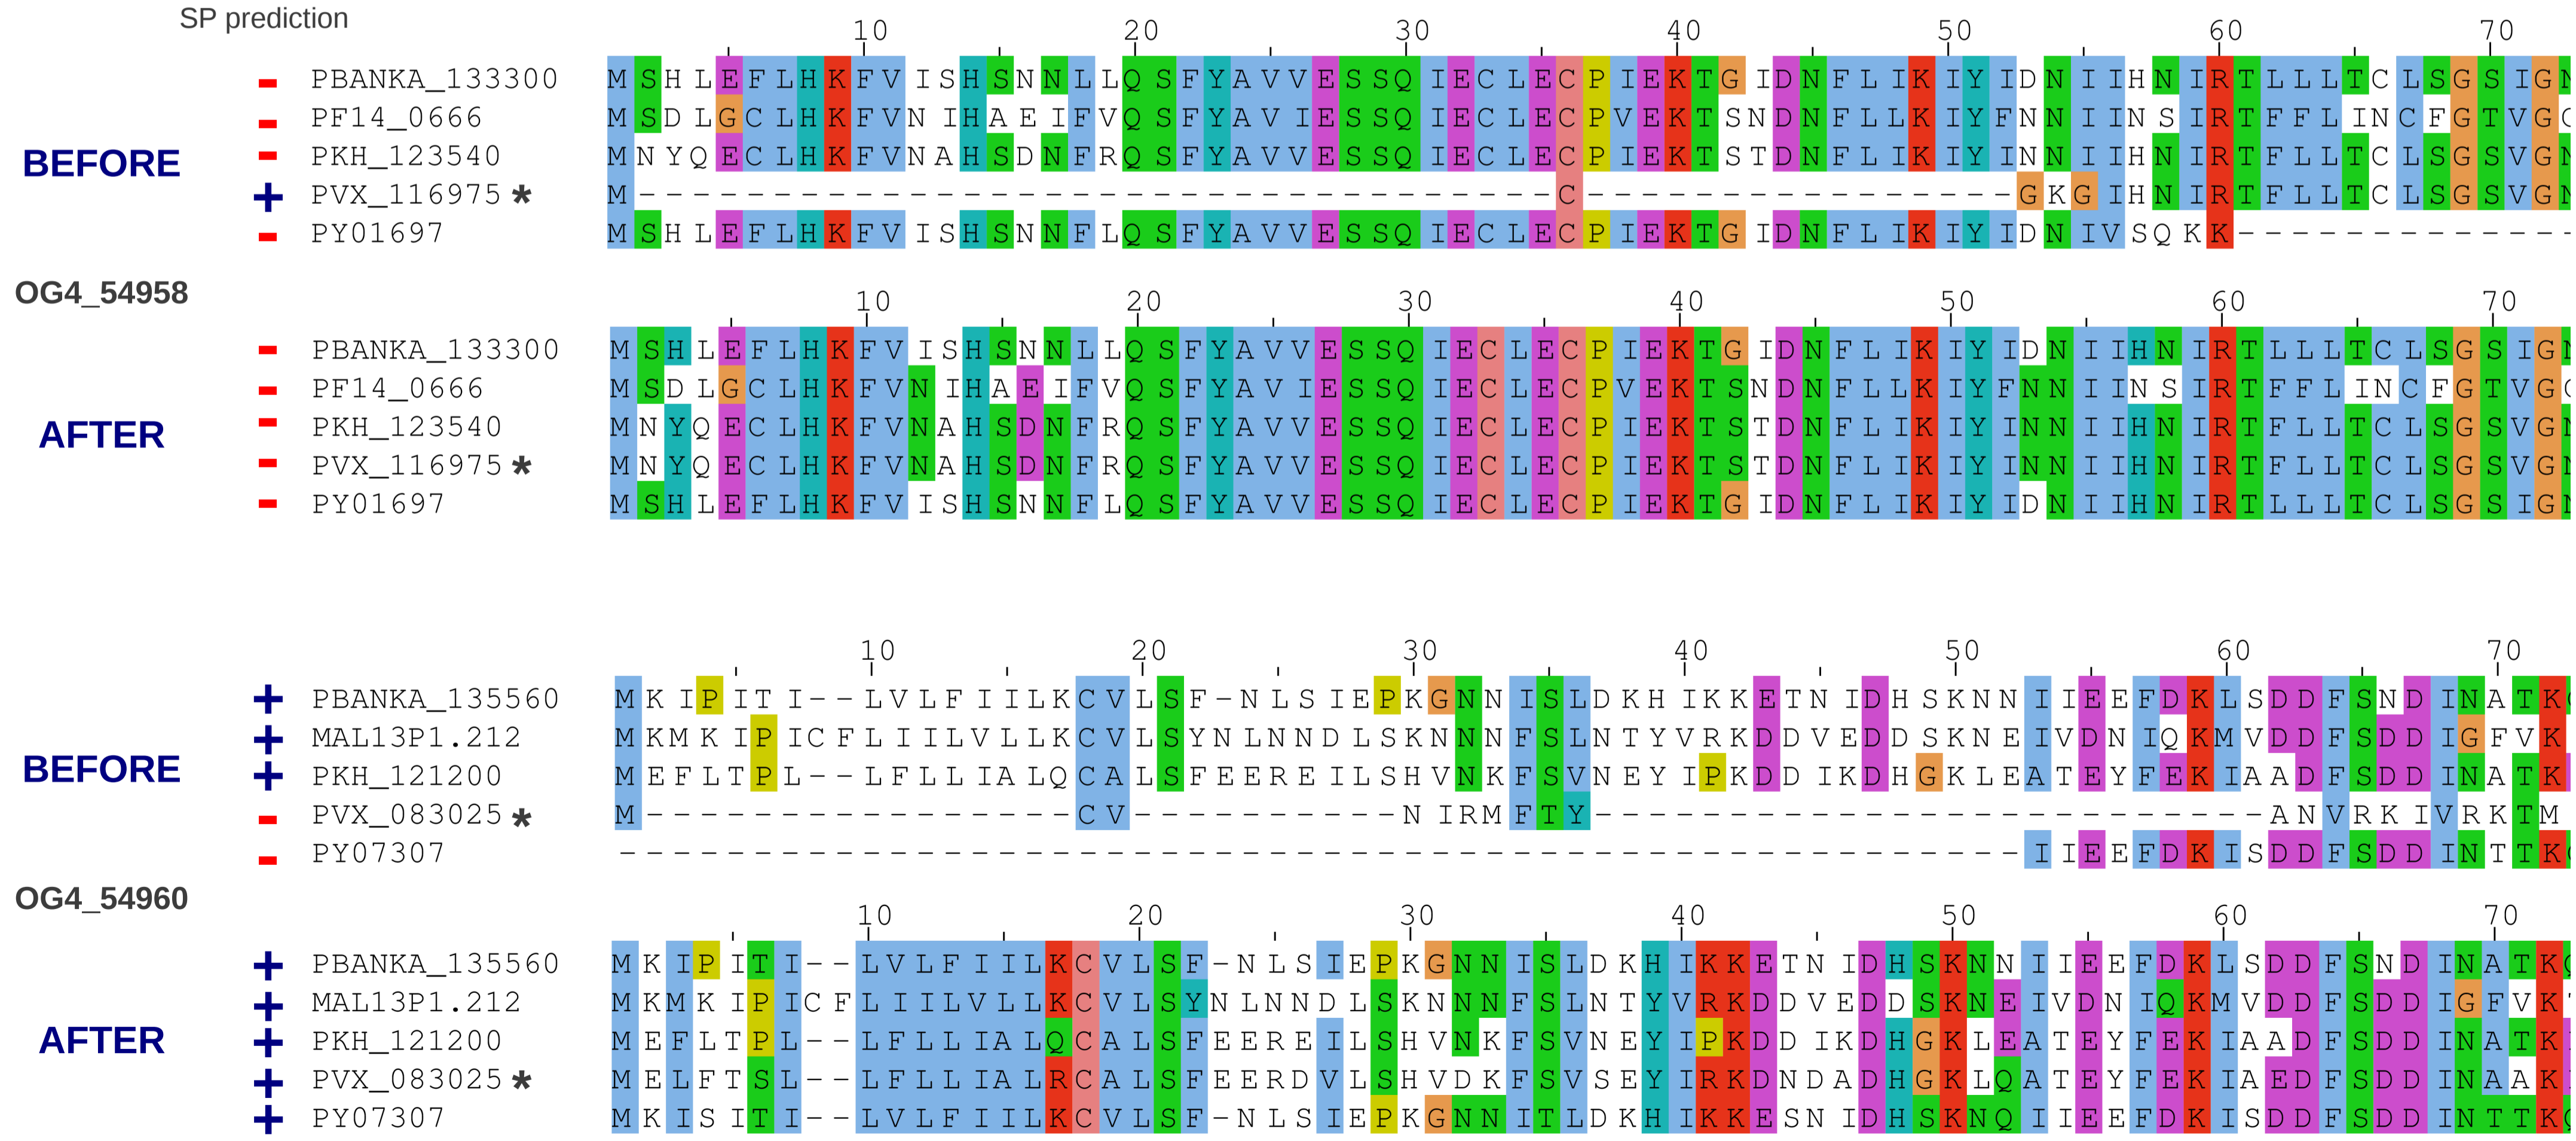

Supplement: MOESM1 [file 9543182]
